# Supplementary material for: Effect of phase coarsening under melt annealing on the electrical performance of polymer composites with a double percolation structure
Source: Royal Society of Chemistry journal article supplement (doi:10.1039/c7cp07493j), 2017-11-27
Supplement: c7cp07493j1.pdf [file c7cp07493j1.pdf]

## Supporting Information for

# Effect of phase coarsening under melt annealing on the electrical performance of polymer composites with a double percolation structure

Xiao-Rong Sun, Tao Gong, Jun-Hong Pu, Rui-Ying Bao, Bang-Hu Xie, Ming-Bo Yang, Wei Yang\*

State Key Laboratory of Polymer Materials Engineering, College of Polymer Science and  
Engineering, Sichuan University, Chengdu 610065, China

## Results

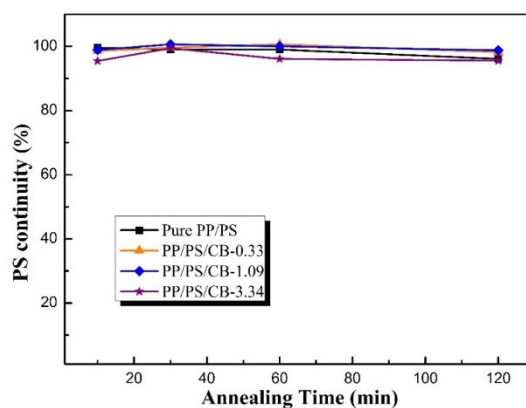

Figure S1. Continuity of PS phase as a function of the annealing time at 190 °C.
